# Supplementary material for: Notch2 and Notch3 Function Together to Regulate Vascular Smooth Muscle Development
Source: PubMed Central journal article supplement (PMC3355134; doi:10.1371/journal.pone.0037365), 2012-05-17
Supplement: pone.0037365.s005.pdf [file pone.0037365.s005.pdf]

**Table S2. Quantitative RT-PCR primer sequences**

| <b>Mouse Primers</b> |                                                 |
|----------------------|-------------------------------------------------|
| SMA forward          | TCCTGACGCTGAAGTATCCGATA                         |
| SMA reverse          | GGTGCCAGATCTTTCCATGTC                           |
| SM22α forward        | CACAAACGACCAAGCCTTCTC                           |
| SM22α reverse        | TCGGCTCATGCCGTAGGA                              |
| Cnn1 forward         | AGCAGGAGCTGAGAGAGTGGAT                          |
| Cnn1 reverse         | CCGTCTTTGAGGCCATACATG                           |
| Pecam1 forward       | TGCGGTGGTTGTCATTGG                              |
| Pecam1 reverse       | TGTTTGGCCTTGGCTTTCC                             |
| Hey1 forward         | CGCAGAGGGATCATAGAGAAACG                         |
| Hey1 reverse         | GCCAGGGCTCGGGCATCAAAGAA                         |
| Hey2 forward         | CACATCAGAGTCAACCCCATGT                          |
| Hey2 reverse         | GCCATGAGCAGAAGGCACTT                            |
| Hes1 forward         | CCCCAGCCAGTGTCAACAC                             |
| Hes1 reverse         | TGTGCTCAGAGGCCGTCTT                             |
| 18S forward          | GTTGGTTTTCGGAACTGAGGC                           |
| 18S reverse          | GTCGGCATCGTTTATGGTCG                            |
| GAPDH forward        | GACGGCCGCATCTTCTTGT                             |
| GAPDH reverse        | CACACCGACCTTCACCATTTT                           |
| <b>Human Primers</b> |                                                 |
| Notch2 forward       | ACAGTTGTGTCTGCTCACCAGGAT (extracellular domain) |
| Notch2 reverse       | GCGGAAACCATTACACCGTTGAT (extracellular domain)  |
| Notch3 forward       | CCTAGACCTGGTGGACAAG (extracellular domain)      |
| Notch3 reverse       | ACACAGTCGTAGCGGTTG (extracellular domain)       |
| SMA forward          | CAAGTGATCACCATCGGAAATG                          |
| SMA reverse          | GACTCCATCCCGATGAAGGA                            |
| Calponin forward     | TGAAGCCCCACGACATTTTT                            |
| Calponin reverse     | GGGTGGACTGCACCTGTGTA                            |
| SM-MHC forward       | AGAAGCCAGGGAGAAGGAAACCAA                        |
| SM-MHC reverse       | TGGAGCTGACCAGGTCTTCCATTT                        |
| Hey1 forward         | CATACAATGTCTTGTGCAGTACACA                       |
| Hey1 reverse         | GCCAGGGCTCGGGCATCAAAGAA                         |
| Hey2 forward         | TCGCCTCTCCACAACCTCAGA                           |
| Hey2 reverse         | CATTCGGAGGGCTGAATCC                             |
| Hes1 forward         | CGCGTGCAGTCCCAGATATA                            |
| Hes1 reverse         | GCACCAGCTCCGGATCCT                              |
| 18S forward          | GTTGGTTTTCGGAACTGAGGC                           |
| 18S reverse          | GTCGGCATCGTTTATGGTCG                            |

Table S2
