# Supplementary material for: Notch2 and Notch3 Function Together to Regulate Vascular Smooth Muscle Development
Source: PLOS journal article supplement (doi:10.1371/journal.pone.0037365), 2012-05-17
Supplement: S4 (10.1371/journal.pone.0037365.s004) [file journal.pone.0037365.s004]

**Table S1. Recovery of Notch2 (N2) and Notch3 (N3) mutant embryos at various gestational ages**

| Age   | Total Number | N2 <sup>+/+</sup><br>N3 <sup>+/+</sup> | N2 <sup>-/+</sup><br>N3 <sup>+/+</sup> | N2 <sup>-/-</sup><br>N3 <sup>+/+</sup> | N2 <sup>+/+</sup><br>N3 <sup>-/+</sup> | N2 <sup>-/+</sup><br>N3 <sup>-/+</sup> | N2 <sup>-/-</sup><br>N3 <sup>-/+</sup> | N2 <sup>+/+</sup><br>N3 <sup>-/-</sup> | N2 <sup>-/+</sup><br>N3 <sup>-/-</sup> | N2 <sup>-/-</sup><br>N3 <sup>-/-</sup> |
|-------|--------------|----------------------------------------|----------------------------------------|----------------------------------------|----------------------------------------|----------------------------------------|----------------------------------------|----------------------------------------|----------------------------------------|----------------------------------------|
| E10.5 | 286          | 14                                     | 39                                     | 17                                     | 34                                     | 75                                     | 34                                     | 18                                     | 33                                     | 22                                     |
|       | (Expected)   | (18)                                   | (36)                                   | (18)                                   | (36)                                   | (72)                                   | (36)                                   | (18)                                   | (36)                                   | (18)                                   |
| E11.5 | 249          | 16                                     | 39                                     | 19                                     | 36                                     | 64                                     | 24                                     | 13                                     | 25                                     | 13                                     |
|       | (Expected)   | (12)                                   | (24)                                   | (12)                                   | (24)                                   | (48)                                   | (24)                                   | (12)                                   | (24)                                   | (12)                                   |
| E12.5 | 119          | 6                                      | 19                                     | 5*                                     | 13                                     | 31                                     | 8                                      | 7                                      | 19                                     | 11*                                    |
|       | (Expected)   | (7)                                    | (15)                                   | (7)                                    | (15)                                   | (30)                                   | (15)                                   | (7)                                    | (15)                                   | (7)                                    |

Embryos from the intercross of *N2<sup>-/+</sup>;N3<sup>-/+</sup>* mice were collected and genotyped at the indicated embryonic day (E) of gestation.

\* At E12.5, 100% (11 out of 11) *N2<sup>-/-</sup>;N3<sup>-/-</sup>* embryos were being resorbed, compared to 40% (2 out of 5) of *N2<sup>-/-</sup>; N3<sup>+/+</sup>* embryos.
